# Supplementary material
Source: PubMed Central journal article supplement (PMC3721603)
Supplement: supp_blood-2012-01-403113_blood-2012-01-403113-1.pdf [file supp_blood-2012-01-403113_blood-2012-01-403113-1.pdf]

**Table S1: individual clinical and genetic information on study participants.****Part 1: ADAMTS13 mutations and genotype score.**

| Cohort  | Patient number | Family number | Mutation      | Mutation classification<br>N-/C-terminal | Mutation severity score<br>(=1 for N-terminal and =0 for C-terminal) | Genotype severity score<br>(sum of mutation severity scores) |
|---------|----------------|---------------|---------------|------------------------------------------|----------------------------------------------------------------------|--------------------------------------------------------------|
| Bergamo | 1              | 1             | p.E1382Rfs*6  | C                                        | 0                                                                    | 0                                                            |
|         |                |               | p.E1382Rfs*6  | C                                        | 0                                                                    |                                                              |
| Bergamo | 2              | 2             | p.R1123C      | C                                        | 0                                                                    | 0                                                            |
|         |                |               | p.R1123C      | C                                        | 0                                                                    |                                                              |
| Bergamo | 3              | 3             | p.W1016*      | C                                        | 0                                                                    | 1                                                            |
|         |                |               | p.G236C       | N                                        | 1                                                                    |                                                              |
| Bergamo | 4              | 4             | p.W28Lfs*111  | Not classified                           | NA                                                                   | NA                                                           |
|         |                |               | p.R1060W      | C                                        | 1                                                                    |                                                              |
| Bergamo | 5              | 4             | p.W28Lfs*111  | Not classified                           | NA                                                                   | NA                                                           |
|         |                |               | p.R1060W      | C                                        | 1                                                                    |                                                              |
| UK      | 6              | 5             | p.R1060W      | C                                        | 0                                                                    | 0                                                            |
|         |                |               | p.R1060W      | C                                        | 0                                                                    |                                                              |
| UK      | 7              | 6             | p.R1206*      | C                                        | 0                                                                    | 0                                                            |
|         |                |               | p.R1060W      | C                                        | 0                                                                    |                                                              |
| UK      | 8              | 7             | p.R1060W      | C                                        | 0                                                                    | 0                                                            |
|         |                |               | p.R1060W      | C                                        | 0                                                                    |                                                              |
| UK      | 9              | 8             | p.R1060W      | C                                        | 0                                                                    | 0                                                            |
|         |                |               | p.R1060W      | C                                        | 0                                                                    |                                                              |
| UK      | 10             | 9             | p.S240Afs*7   | Not classified                           | NA                                                                   | NA                                                           |
|         |                |               | p.R910*       | C                                        | 0                                                                    |                                                              |
| UK      | 11             | 9             | p.S240Afs*7   | Not classified                           | NA                                                                   | NA                                                           |
|         |                |               | p.R910*       | C                                        | 0                                                                    |                                                              |
| UK      | 12             | 9             | p.S240Afs*7   | Not classified                           | NA                                                                   | NA                                                           |
|         |                |               | p.R910*       | C                                        | 0                                                                    |                                                              |
| France  | 13             | 10            | p.R507Q       | N                                        | 1                                                                    | 2                                                            |
|         |                |               | p.A596V       | N                                        | 1                                                                    |                                                              |
| France  | 14             | 11            | c.825-?_?del  | Not classified                           | NA                                                                   | NA                                                           |
|         |                |               | p.C758R       | N                                        | 0                                                                    |                                                              |
| France  | 15             | 12            | p.I79M        | N                                        | 1                                                                    | 2                                                            |
|         |                |               | p.R268P       | N                                        | 1                                                                    |                                                              |
| France  | 16             | 13            | p.A596V       | N                                        | 1                                                                    | 2                                                            |
|         |                |               | p.A596V       | N                                        | 1                                                                    |                                                              |
| France  | 17             | 14            | p.S1085Cfs*12 | C                                        | 0                                                                    | 1                                                            |
|         |                |               | p.S203P       | N                                        | 1                                                                    |                                                              |
| Milan   | 18             | 15            | p.V88M        | N                                        | 1                                                                    | 1                                                            |
|         |                |               | p.G1239V      | C                                        | 0                                                                    |                                                              |

|       |    |    |                      |                |    |    |
|-------|----|----|----------------------|----------------|----|----|
| Milan | 19 | 16 | p.E98Pfs*31          | Not classified | NA | NA |
|       |    |    | p.E1382Rfs*6         | C              | 0  |    |
| Milan | 20 | 17 | p.C977_R979delinsW   | C              | 0  | 0  |
|       |    |    | p.C977_R979delinsW   | C              | 0  |    |
| Milan | 21 | 18 | p.I143T              | N              | 1  | 2  |
|       |    |    | p.I143T              | N              | 1  |    |
| Milan | 22 | 19 | p.Q436H              | N              | 1  | 2  |
|       |    |    | p.Q436H              | N              | 1  |    |
| Milan | 23 | 20 | p.R1060W             | C              | 0  | 0  |
|       |    |    | p.R1060W             | C              | 0  |    |
| Milan | 24 | 21 | p.R102C              | N              | 1  | 2  |
|       |    |    | p. D235Y             | N              | 1  |    |
| Milan | 25 | 17 | p.C977_R979delinsW   | C              | 0  | 0  |
|       |    |    | p.C977_R979delinsW   | C              | 0  |    |
| Milan | 26 | 22 | p.R193Q              | N              | 1  | 1  |
|       |    |    | p.R1095W             | C              | 0  |    |
| Milan | 27 | 23 | p.(S36_C37delfs*102) | Not classified | NA | NA |
|       |    |    | p.(S36_C37delfs*102) | Not classified | NA |    |
| Milan | 28 | 24 | p.S150P              | N              | 1  | 2  |
|       |    |    | p.S150P              | N              | 1  |    |
| Milan | 29 | 25 | p.A596V              | N              | 1  | 1  |
|       |    |    | p.C1084Y             | C              | 0  |    |

**Part 2: ADAMTS13 measurement by SELDI-TOF mass spectrometry.**

| Cohort  | Patient Number | ADAMTS13 Activity°, % | A13:Act Replicate 1, % | A13:Act Replicate 2, % | A13:Act Difference in the two replicates, % |
|---------|----------------|-----------------------|------------------------|------------------------|---------------------------------------------|
| Bergamo | 1              | 4.46                  | 4.00                   | 4.91                   | 0.91                                        |
| Bergamo | 2              | 6.77                  | 6.04                   | 7.49                   | 1.45                                        |
| Bergamo | 3              | 1.01                  | 0.97                   | 1.04                   | 0.07                                        |
| Bergamo | 4              | 3.47                  | 3.73                   | 3.20                   | 0.53                                        |
| Bergamo | 5              | 3.89                  | 3.64                   | 4.14                   | 0.50                                        |
| UK      | 6              | 4.73                  | 4.66                   | 4.79                   | 0.13                                        |
| UK      | 7              | 3.83                  | 3.82                   | 3.84                   | 0.02                                        |
| UK      | 8              | 6.37                  | 5.82                   | 6.93                   | 1.11                                        |
| UK      | 9              | 5.98                  | 5.82                   | 6.14                   | 0.32                                        |
| UK      | 10             | 0.54                  | 0.52                   | 0.56                   | 0.04                                        |
| UK      | 11             | 0.57                  | 0.57                   | 0.56                   | 0.01                                        |
| UK      | 12             | 1.42                  | 1.45                   | 1.39                   | 0.06                                        |
| France  | 13             | 3.49                  | 3.34                   | 3.65                   | 0.31                                        |
| France  | 14             | 6.67                  | 6.27                   | 7.07                   | 0.80                                        |
| France  | 15             | 2.39                  | 2.16                   | 2.61                   | 0.45                                        |
| France  | 16             | 4.97                  | 4.71                   | 5.23                   | 0.52                                        |
| France  | 17             | 2.39                  | 2.47                   | 2.31                   | 0.16                                        |
| Milan   | 18             | 5.14                  | 5.27                   | 5.02                   | 0.25                                        |
| Milan   | 19             | 1.96                  | 1.96                   | 1.96                   | 0.00                                        |

|       |    |      |      |      |      |
|-------|----|------|------|------|------|
| Milan | 20 | 3.08 | 3.07 | 3.08 | 0.01 |
| Milan | 21 | 0.25 | 0.25 | 0.25 | 0.00 |
| Milan | 22 | 0.25 | 0.25 | 0.25 | 0.00 |
| Milan | 23 | 5.94 | 5.89 | 5.98 | 0.09 |
| Milan | 24 | 1    | 0.94 | 1.06 | 0.12 |
| Milan | 25 | 1.79 | 1.71 | 1.87 | 0.16 |
| Milan | 26 | 5.53 | 5.69 | 5.38 | 0.31 |
| Milan | 27 | 0.67 | 0.65 | 0.70 | 0.05 |
| Milan | 28 | 1.28 | 1.27 | 1.29 | 0.02 |
| Milan | 29 | 0.25 | 0.25 | 0.25 | 0.00 |

°Measured by SELDI-TOF mass spectrometry

**Part 3: Clinical phenotype.**

| Gender | Age at last follow-up | Total number of TTP episodes | Annual Rate of TTP episodes | FFP prophylaxis | Age at first TTP episode requiring treatment with FFP |
|--------|-----------------------|------------------------------|-----------------------------|-----------------|-------------------------------------------------------|
| M      | 36                    | 26                           | 0.72                        | 1               | 18                                                    |
| M      | 36                    | Na*                          | Na*                         | 0               | 21                                                    |
| M      | 29                    | 5                            | 0.17                        | 0               | 5                                                     |
| F      | 38                    | 4                            | 0.11                        | 0               | 20                                                    |
| F      | 36                    | 1                            | 0.03                        | 0               | 28                                                    |
| F      | 25                    | 1                            | 0.04                        | 0               | 24                                                    |
| F      | 32                    | 3                            | 0.09                        | 0               | 30                                                    |
| F      | 30                    | 1                            | 0.03                        | 0               | 29                                                    |
| F      | 42                    | 2                            | 0.05                        | 0               | 32                                                    |
| M      | 6                     | 23                           | 3.83                        | 1               | 0.16                                                  |
| M      | 13                    | 30                           | 2.31                        | 1               | 0.16                                                  |
| M      | 15                    | 56                           | 4                           | 1               | 0.16                                                  |
| F      | 27                    | 10                           | 0.37                        | 1               | 0.16                                                  |
| M      | 18                    | 6                            | 0.33                        | 1               | 0.16                                                  |
| F      | 13                    | 10                           | 0.77                        | 1               | 0.16                                                  |
| F      | 14                    | 8                            | 0.57                        | 0               | 0.16                                                  |
| F      | 16                    | 2                            | 0.33                        | 0               | 0.16                                                  |
| M      | 66                    | 10                           | 0.37                        | 0               | 23                                                    |
| F      | 27                    | 6                            | 0.09                        | 1               | 15                                                    |

|   |    |    |      |      |      |
|---|----|----|------|------|------|
| M | 29 | 4  | 0.14 | 0    | 22   |
| M | 22 | 5  | 0.23 | 0    | 11   |
| M | 9  | 30 | 3.33 | 1    | 0.16 |
| F | 28 | 2  | 0.07 | 0    | 18   |
| F | 9  | 5  | 0.56 | 0    | 2    |
| M | 34 | 1  | 0.03 | 0    | 29   |
| F | 36 | 1  | 0.03 | 0    | 32   |
| F | 4  | 3  | 0.75 | 1    | 0.16 |
| F | 8  | 1  | 0.13 | Na** | 5    |
| M | 3  | 8  | 2.57 | 1    | 1    |

\*Chronic jaundice and thrombocytopenia

\*\*Current prophylaxis status unknown

**Part 3: Clinical phenotype (continued).**

| Cohort  | Patient Number | Persistent renal or neurological damage | History of neonatal jaundice or thrombocytopenia |
|---------|----------------|-----------------------------------------|--------------------------------------------------|
| Bergamo | 1              | 1                                       | 0                                                |
| Bergamo | 2              | 1                                       | 1                                                |
| Bergamo | 3              | 0                                       | 0                                                |
| Bergamo | 4              | 0                                       | 0                                                |
| Bergamo | 5              | 0                                       | 0                                                |
| UK      | 6              | 0                                       | 0                                                |
| UK      | 7              | 0                                       | 0                                                |
| UK      | 8              | 0                                       | 0                                                |
| UK      | 9              | 0                                       | 0                                                |
| UK      | 10             | 0                                       | 1                                                |
| UK      | 11             | 0                                       | 1                                                |
| UK      | 12             | 0                                       | 1                                                |
| France  | 13             | 0                                       | 1                                                |
| France  | 14             | 0                                       | 1                                                |
| France  | 15             | 0                                       | 1                                                |
| France  | 16             | 1                                       | 1                                                |
| France  | 17             | 0                                       | 1                                                |
| Milan   | 18             | 0                                       | 0                                                |
| Milan   | 19             | 0                                       | 0                                                |

|       |    |   |   |
|-------|----|---|---|
| Milan | 20 | 0 | 0 |
| Milan | 21 | 0 | 0 |
| Milan | 22 | 0 | 1 |
| Milan | 23 | 0 | 0 |
| Milan | 24 | 0 | 0 |
| Milan | 25 | 0 | 0 |
| Milan | 26 | 0 | 0 |
| Milan | 27 | 0 | 1 |
| Milan | 28 | 0 | 0 |
| Milan | 29 | 0 | 0 |



**Table S2.** List of protein sequences, functionally related with ADAMTS13, used by SIFT to predict the weighted probability of aminoacid substitutions.

| <b>GI identifier</b> | <b>Protein</b>                                                         | <b>Organism</b>               |
|----------------------|------------------------------------------------------------------------|-------------------------------|
| gi16306598           | von Willebrand factor-cleaving protease                                | Homo sapiens                  |
| gi355567362          | hypothetical protein EGK_07235                                         | Macaca mulatta                |
| gi296191110          | A disintegrin and metalloproteinase with thrombospondin motifs 13      | Callithrix jacchus            |
| gi332833255          | A disintegrin and metalloproteinase with thrombospondin motifs 13      | Pan troglodytes               |
| gi355752956          | hypothetical protein EGM_06555                                         | Macaca fascicularis           |
| gi332255397          | A disintegrin and metalloproteinase with thrombospondin motifs 13      | Nomascus leucogenys           |
| gi335281186          | A disintegrin and metalloproteinase with thrombospondin motifs 13      | Sus scrofa                    |
| gi354499351          | A disintegrin and metalloproteinase with thrombospondin motifs 13      | Cricetulus griseus            |
| gi301770673          | A disintegrin and metalloproteinase with thrombospondin motifs 13      | Ailuropoda melanoleuca        |
| gi47076321           | vWF-cleaving protease                                                  | Mus musculus                  |
| gi76671947           | A disintegrin and metalloproteinase with thrombospondin motifs 13      | Bos taurus                    |
| gi348574536          | A disintegrin and metalloproteinase with thrombospondin motifs 13      | Cavia porcellus               |
| gi334311967          | A disintegrin and metalloproteinase with thrombospondin motifs 13      | Monodelphis domestica         |
| gi351702668          | A disintegrin and metalloproteinase with thrombospondin motifs 14      | Heterocephalus glaber         |
| gi291416170          | ADAM metallopeptidase with thrombospondin type 1 motif, 13             | Oryctolagus cuniculus         |
| gi337298368          | ADAM metallopeptidase with thrombospondin type 1 motif, 13             | Canis lupus familiaris        |
| gi301627601          | A disintegrin and metalloproteinase with thrombospondin motifs 13-like | Xenopus (Silurana) tropicalis |
| gi47214646           | Unnamed protein product                                                | Tetraodon nigroviridis        |
| gi170587999          | ADAM-TS Spacer 1 family protein                                        | Brugia malayi                 |
| gi327277760          | A disintegrin and metalloproteinase with thrombospondin motifs 9-like  | Anolis carolinensis           |
| gi324499880          | A disintegrin and metalloproteinase with thrombospondin motifs gon-1   | Ascaris suum                  |
| gi312073463          | hypothetical protein                                                   | Loa loa                       |
| gi341881902          | CBN-GON-1 protein                                                      | Caenorhabditis brenneri       |

|             |                                                                                                 |                                 |
|-------------|-------------------------------------------------------------------------------------------------|---------------------------------|
| gi187036667 | CBR-GON-1 protein                                                                               | Caenorhabditis briggsae<br>AF16 |
| gi189310657 | Protein GON-1, isoform a                                                                        | Caenorhabditis elegans          |
| gi308481215 | CRE-GON-1 protein                                                                               | Caenorhabditis remanei          |
| gi194225985 | A disintegrin and metalloproteinase with thrombospondin motifs 13                               | Equus caballus                  |
| gi344276566 | A disintegrin and metalloproteinase with thrombospondin motifs 9                                | Loxodonta africana              |
| gi224073646 | ADAM metalloproteinase with thrombospondin type 1 motif, 13                                     | Taeniopygia guttata             |
| gi326930462 | A disintegrin and metalloproteinase with thrombospondin motifs 13-like                          | Meleagris gallopavo             |
| gi345305489 | A disintegrin and metalloproteinase with thrombospondin motifs 20-like                          | Ornithorhynchus anatinus        |
| gi363740569 | A disintegrin and metalloproteinase with thrombospondin motifs 13                               | Gallus gallus                   |
| gi291233410 | A disintegrin-like and metalloprotease with thrombospondin type 1 motifs 9B-like                | Saccoglossus kowalevskii        |
| gi293348901 | A disintegrin-like and metalloproteinase (reprolysin type) with thrombospondin type 1 motif, 20 | Rattus norvegicus               |
| gi156554461 | A disintegrin and metalloproteinase with thrombospondin motifs 9-like                           | Nasonia vitripennis             |
| gi307177515 | A disintegrin and metalloproteinase with thrombospondin motifs 9                                | Camponotus floridanus           |
| gi242016083 | ADAMTS-15 precursor, putative                                                                   | Pediculus humanus corporis      |
| gi326670284 | A disintegrin and metalloproteinase with thrombospondin motifs 13                               | Danio rerio                     |
| gi317419046 | A disintegrin and metalloproteinase with thrombospondin motifs 9                                | Dicentrarchus labrax            |
| gi156393647 | Predicted protein, partial                                                                      | Nematostella vectensis          |
| gi348516300 | A disintegrin and metalloproteinase with thrombospondin motifs 13-like                          | Oreochromis niloticus           |
| gi115961217 | Similar to ADAM metalloproteinase with thrombospondin type 1 motif, 16 preproprotein            | Strongylocentrotus purpuratus   |
| gi297674911 | a disintegrin and metalloproteinase with thrombospondin motifs 16-like                          | Pongo abelii                    |
| gi328712328 | A disintegrin and metalloproteinase with thrombospondin motifs 9                                | Acyrtosiphon pisum              |
| gi332022171 | A disintegrin and metalloproteinase with thrombospondin motifs 7                                | Acromyrmex echinator            |
| gi340729183 | A disintegrin and metalloproteinase with thrombospondin motifs 7-like                           | Bombus terrestris               |

|             |                                                                                                    |                                               |
|-------------|----------------------------------------------------------------------------------------------------|-----------------------------------------------|
| gi350417726 | A disintegrin and metalloproteinase with thrombospondin motifs 7-like                              | <i>Bombus impatiens</i>                       |
| gi221130399 | similar to abnormal GONad development family member (gon-1)                                        | <i>Hydra magnipapillata</i>                   |
| gi328791471 | A disintegrin and metalloproteinase with thrombospondin motifs 7-like                              | <i>Apis mellifera</i>                         |
| gi307204909 | A disintegrin and metalloproteinase with thrombospondin motifs 7                                   | <i>Harpegnathos saltator</i>                  |
| gi157110122 | Adamts-7                                                                                           | <i>Aedes aegypti</i>                          |
| gi198434768 | similar to ADAMTS-18 precursor (A disintegrin and metalloproteinase with thrombospondin motifs 18) | <i>Ciona intestinalis</i>                     |
| gi241752359 | Thrombospondin-like protein, putative                                                              | <i>Ixodes scapularis</i>                      |
| gi229286595 | Hypothetical protein BRAFLDRAFT_81341                                                              | <i>Branchiostoma floridae</i>                 |
| gi125980875 | GA17954 - gene product from transcript GA17954-RA                                                  | <i>Drosophila pseudoobscura pseudoobscura</i> |
| gi195162497 | GL14460 gene product from transcript GL14460-RA                                                    | <i>Drosophila persimilis</i>                  |
| gi270002066 | Hypothetical protein TcasGA2_TC001014                                                              | <i>Tribolium castaneum</i>                    |
| gi347965338 | AGAP001113-PA, partial                                                                             | <i>Anopheles gambiae</i> str. PEST            |
| gi321479334 | Hypothetical protein                                                                               | <i>Daphnia pulex</i>                          |
| gi195043400 | GH12754 gene product from transcript GH12754-RA                                                    | <i>Drosophila grimshawi</i>                   |
| gi195131919 | GI15899 gene product from transcript GI15899-RA                                                    | <i>Drosophila mojavensis</i>                  |
| gi195340560 | GM12429 gene product from transcript GM12429-RA                                                    | <i>Drosophila sechellia</i>                   |
| gi281359911 | CG4096 gene product from transcript CG4096-RB                                                      | <i>Drosophila melanogaster</i>                |
| gi195396533 | GJ16647 gene product from transcript GJ16647-RA                                                    | <i>Drosophila virilis</i>                     |
| gi194888962 | GG18778 gene product from transcript GG18778-RA                                                    | <i>Drosophila erecta</i>                      |
| gi194764322 | GF20800 gene product from transcript GF20800-RA                                                    | <i>Drosophila ananassae</i>                   |
| gi195448967 | GK24921 gene product from transcript GK24921-RA                                                    | <i>Drosophila willistoni</i>                  |
| gi55249587  | Adamts1 protein                                                                                    | <i>Xenopus laevis</i>                         |
| gi195501264 | GE26372 gene product from transcript GE26372-RA                                                    | <i>Drosophila yakuba</i>                      |
| gi357614481 | Hypothetical protein                                                                               | <i>Danaus plexippus</i>                       |
| gi157278173 | ADAMTS-1 protein precursor                                                                         | <i>Oryzias latipes</i>                        |
| gi313245795 | Unnamed protein product                                                                            | <i>Oikopleura dioica</i>                      |

|             |                                                                            |                                      |
|-------------|----------------------------------------------------------------------------|--------------------------------------|
| gi34452244  | Egg bindin receptor protein 1 precursor                                    | Strongylocentrotus franciscanus      |
| gi170069658 | Adamts-7                                                                   | Culex quinquefasciatus               |
| gi195996845 | Hypothetical protein                                                       | Trichoplax adhaerens                 |
| gi112983432 | A disintegrin and metalloproteinase with thrombospondin motifs 1 precursor | Bombyx mori                          |
| gi268580489 | C. briggsae CBR-ADT-1 protein                                              | Caenorhabditis briggsae              |
| gi195574509 | GD18032 gene product from transcript GD18032-RA                            | Drosophila simulans                  |
| gi6164595   | Lacunin - large multidomain extracellular matrix protein                   | Manduca sexta                        |
| gi290886119 | ADAM metalloproteinase with thrombospondin type 1 motif 1                  | Ovis aries                           |
| gi13346812  | Thrombospondin                                                             | Haemonchus contortus                 |
| gi256071138 | ADAMTS5 peptidase (M12 family)"                                            | Schistosoma mansoni                  |
| gi170791244 | Thrombospondin-like protein                                                | Dictyocaulus viviparus               |
| gi358338697 | A disintegrin and metalloproteinase with thrombospondin motifs 3           | Clonorchis sinensis                  |
| gi339237895 | Papilin                                                                    | Trichinella spiralis                 |
| gi312373041 | Hypothetical protein                                                       | Anopheles darlingi                   |
| gi301130834 | Papilin                                                                    | Rhipicephalus microplus              |
| gi322787488 | Hypothetical protein                                                       | Solenopsis invicta                   |
| gi218780434 | Thrombospondin, type 1 repeat-containing protein                           | Desulfatibacillum alkenivorans AK-01 |
| gi320169775 | Thrombospondin                                                             | Capsaspora owczarzaki ATCC 30864     |
| gi307111205 | Hypothetical protein                                                       | Chlorella variabilis                 |
| gi340378441 | Hypothetical protein                                                       | Amphimedon queenslandica             |
| gi323650036 | A disintegrin and metalloproteinase with thrombospondin motifs 16          | Perca flavescens                     |
| gi226457552 | Predicted protein                                                          | Micromonas pusilla CCMP1545          |
| gi146271971 | HyTSR1 protein                                                             | Hydra vulgaris                       |
| gi110735379 | Rhamnospondin                                                              | Hydractinia symbiolongicarpus        |
| gi139689701 | Hypothetical protein                                                       | marine metagenome                    |
| gi339521865 | Thrombospondin 1                                                           | Capra hircus                         |
| gi13928546  | Complement component C6                                                    | Branchiostoma belcheri               |

**Table S3. Multiple measurements in the same patients on different samples.** Similar residual activity was measured in samples collected months apart from the same patients.

| Patient NO (see Supplementary Material S1) | ADAMTS13 activity* | A13:Act Replicate 1 | A13:Act Replicate 2 |
|--------------------------------------------|--------------------|---------------------|---------------------|
| 9                                          | 5.98               | 5.82                | 6.14                |
|                                            | 5.19               | 4.97                | 5.41                |
| 26                                         | 5.53               | 5.69                | 5.38                |
|                                            | 6.57               | 6.81                | 6.33                |
| 27                                         | 0.67               | 0.65                | 0.70                |
|                                            | 0.58               | 0.58                | 0.59                |

\*Measured by SELDI-TOF mass spectrometry

**Tables S4.** ADAMTS13 missense mutations and polymorphisms and their functional annotation.

| <b>Protein</b>                  | <b>SIFT</b> | <b>Polyphen 2</b> | <b>PMut</b>  | <b>Align GVDG</b> |
|---------------------------------|-------------|-------------------|--------------|-------------------|
| <i>TTP associated mutations</i> |             |                   |              |                   |
| p.I79M                          | T           | BEN               | NEUTRAL      | C0                |
| p.V88M                          | A           | PROD              | NEUTRAL      | C15               |
| p.H96D                          | A           | PROD              | NEUTRAL      | C65               |
| p.R102C                         | T           | PROD              | NEUTRAL      | C65               |
| p.S119F                         | A           | PROD              | NEUTRAL      | C65               |
| p.I178T                         | A           | PROD              | NEUTRAL      | C65               |
| p.R193W                         | A           | PROD              | PATHOLOGICAL | C65               |
| p.T196I                         | A           | PROD              | NEUTRAL      | C65               |
| p.S203P                         | T           | PROD              | PATHOLOGICAL | C65               |
| p.L232Q                         | A           | PROD              | NEUTRAL      | C65               |
| p.H234Q                         | A           | PROD              | NEUTRAL      | C15               |
| p.D235H                         | A           | PROD              | NEUTRAL      | C65               |
| p.G236C                         | A           | PROD              | NEUTRAL      | N/D               |
| p.A250V                         | A           | PROD              | NEUTRAL      | C65               |
| p.S263C                         | A           | PROD              | NEUTRAL      | C65               |
| p.R268P                         | T           | BEN               | NEUTRAL      | C65               |
| p.Y304C                         | T           | PROD              | NEUTRAL      | C65               |
| p.C311Y                         | A           | PROD              | PATHOLOGICAL | C65               |
| p.R312Q                         | T           | PROD              | NEUTRAL      | C35               |
| p.C322G                         | A           | PROD              | NEUTRAL      | C65               |
| p.T323R                         | T           | PROD              | PATHOLOGICAL | C65               |
| p.F324L                         | T           | PROD              | NEUTRAL      | C15               |
| p.C347S                         | A           | PROD              | NEUTRAL      | C65               |
| p.R349C                         | A           | PROD              | NEUTRAL      | C65               |
| p.P353L                         | A           | PROD              | NEUTRAL      | C65               |
| p.G385E                         | A           | PROD              | PATHOLOGICAL | C65               |
| p.W390C                         | A           | PROD              | PATHOLOGICAL | C65               |
| p.R398C                         | A           | PROD              | NEUTRAL      | C35               |
| p.R398H                         | A           | PROD              | PATHOLOGICAL | C25               |
| p.C438S                         | A           | PROD              | NEUTRAL      | C65               |
| p.R507Q                         | T           | PROD              | PATHOLOGICAL | C35               |
| p.C508Y                         | A           | PROD              | PATHOLOGICAL | C65               |
| p.G525D                         | A           | PROD              | PATHOLOGICAL | C65               |

**Table S4.** (continued).

| <b>Protein</b>                  | <b>SIFT</b> | <b>Polyphen 2</b> | <b>PMut</b>  | <b>Align<br/>GVGD</b> |
|---------------------------------|-------------|-------------------|--------------|-----------------------|
| <i>TTP associated mutations</i> |             |                   |              |                       |
| p.R528G                         | T           | PROD              | PATHOLOGICAL | C65                   |
| p.G550R                         | A           | PROD              | PATHOLOGICAL | C65                   |
| p.A596V                         | T           | PROD              | NEUTRAL      | C65                   |
| p.A606P                         | T           | PROD              | PATHOLOGICAL | C25                   |
| p.P671L                         | T           | PROD              | PATHOLOGICAL | C65                   |
| p.I673F                         | T           | PROD              | NEUTRAL      | C15                   |
| p.R692C                         | T           | PROD              | NEUTRAL      | C65                   |
| p.Q723K                         | T           | BEN               | PATHOLOGICAL | C45                   |
| p.C758R                         | A           | PROD              | PATHOLOGICAL | C65                   |
| p.C908S                         | A           | PROD              | PATHOLOGICAL | C65                   |
| p.C908Y                         | A           | PROD              | PATHOLOGICAL | C65                   |
| p.G909R                         | A           | PROD              | PATHOLOGICAL | C65                   |
| p.C951G                         | A           | PROD              | PATHOLOGICAL | C65                   |
| p.C1024R                        | A           | PROD              | PATHOLOGICAL | C65                   |
| p.C1024G                        | A           | PROD              | PATHOLOGICAL | C65                   |
| p.R1060W                        | A           | PROD              | PATHOLOGICAL | C65                   |
| p.R1123C                        | A           | PROD              | PATHOLOGICAL | C65                   |
| p.C1213Y                        | A           | PROD              | PATHOLOGICAL | N/D                   |
| p.I1217T                        | A           | PROD              | PATHOLOGICAL | N/D                   |
| p.R1219W                        | A           | PROD              | PATHOLOGICAL | N/D                   |
| p.G1239V                        | A           | PROD              | PATHOLOGICAL | N/D                   |
| p.R1336W                        | A           | PROD              | PATHOLOGICAL | N/D                   |
| <i>ADAMTS13 polymorphisms</i>   |             |                   |              |                       |
| p.R7W                           | T           | BEN               | PATHOLOGICAL | C65                   |
| p.T339R                         | T           | PROD              | NEUTRAL      | C65                   |
| p.Q448E                         | T           | BEN               | NEUTRAL      | C25                   |
| p.Q456H                         | A           | BEN               | NEUTRAL      | C15                   |
| p.P457L                         | T           | PROD              | NEUTRAL      | C65                   |
| p.P475S                         | T           | BEN               | PATHOLOGICAL | C65                   |

**Table S4.** (continued).

| <b>Protein</b>                | <b>SIFT</b> | <b>Polyphen 2</b> | <b>PMut</b>  | <b>Align GVG D</b> |
|-------------------------------|-------------|-------------------|--------------|--------------------|
| <i>ADAMTS13 polymorphisms</i> |             |                   |              |                    |
| p.R484K                       | T           | BEN               | NEUTRAL      | C25                |
| p.V604I                       | T           | BEN               | NEUTRAL      | C25                |
| p.P618A                       | T           | PROD              | NEUTRAL      | C25                |
| p.R625H                       | T           | PROD              | PATHOLOGICAL | C25                |
| p.E634K                       | T           | BEN               | NEUTRAL      | C55                |
| p.A732V                       | T           | PROD              | NEUTRAL      | C65                |
| p.E740K                       | T           | BEN               | NEUTRAL      | C55                |
| p.V832M                       | T           | PROD              | NEUTRAL      | C15                |
| p.A900V                       | T           | BEN               | NEUTRAL      | C65                |
| p.S903L                       | T           | BEN               | PATHOLOGICAL | C65                |
| p.G982R                       | T           | PROD              | PATHOLOGICAL | C65                |
| p.A1033T                      | T           | PROD              | NEUTRAL      | C55                |
| p.R1096H                      | T           | BEN               | PATHOLOGICAL | C25                |
| p.T1226I                      | T           | BEN               | PATHOLOGICAL | N/D                |

T, tolerated; A, affects protein function; BEN, benign; PROD, probably damaging; N/D, not determinable with Align GVG D software.

For Align GVG D the reported number reflects the severity of the effect of the mutation on the protein, with C0 being the least severe and C65 being the most severe.
